# Supplementary material for: The complete mitochondrial DNA of three monozoic tapeworms in the Caryophyllidea: a mitogenomic perspective on the phylogeny of eucestodes
Source: PubMed Central journal article supplement (PMC5488446; doi:10.1186/s13071-017-2245-y), 2017-06-27

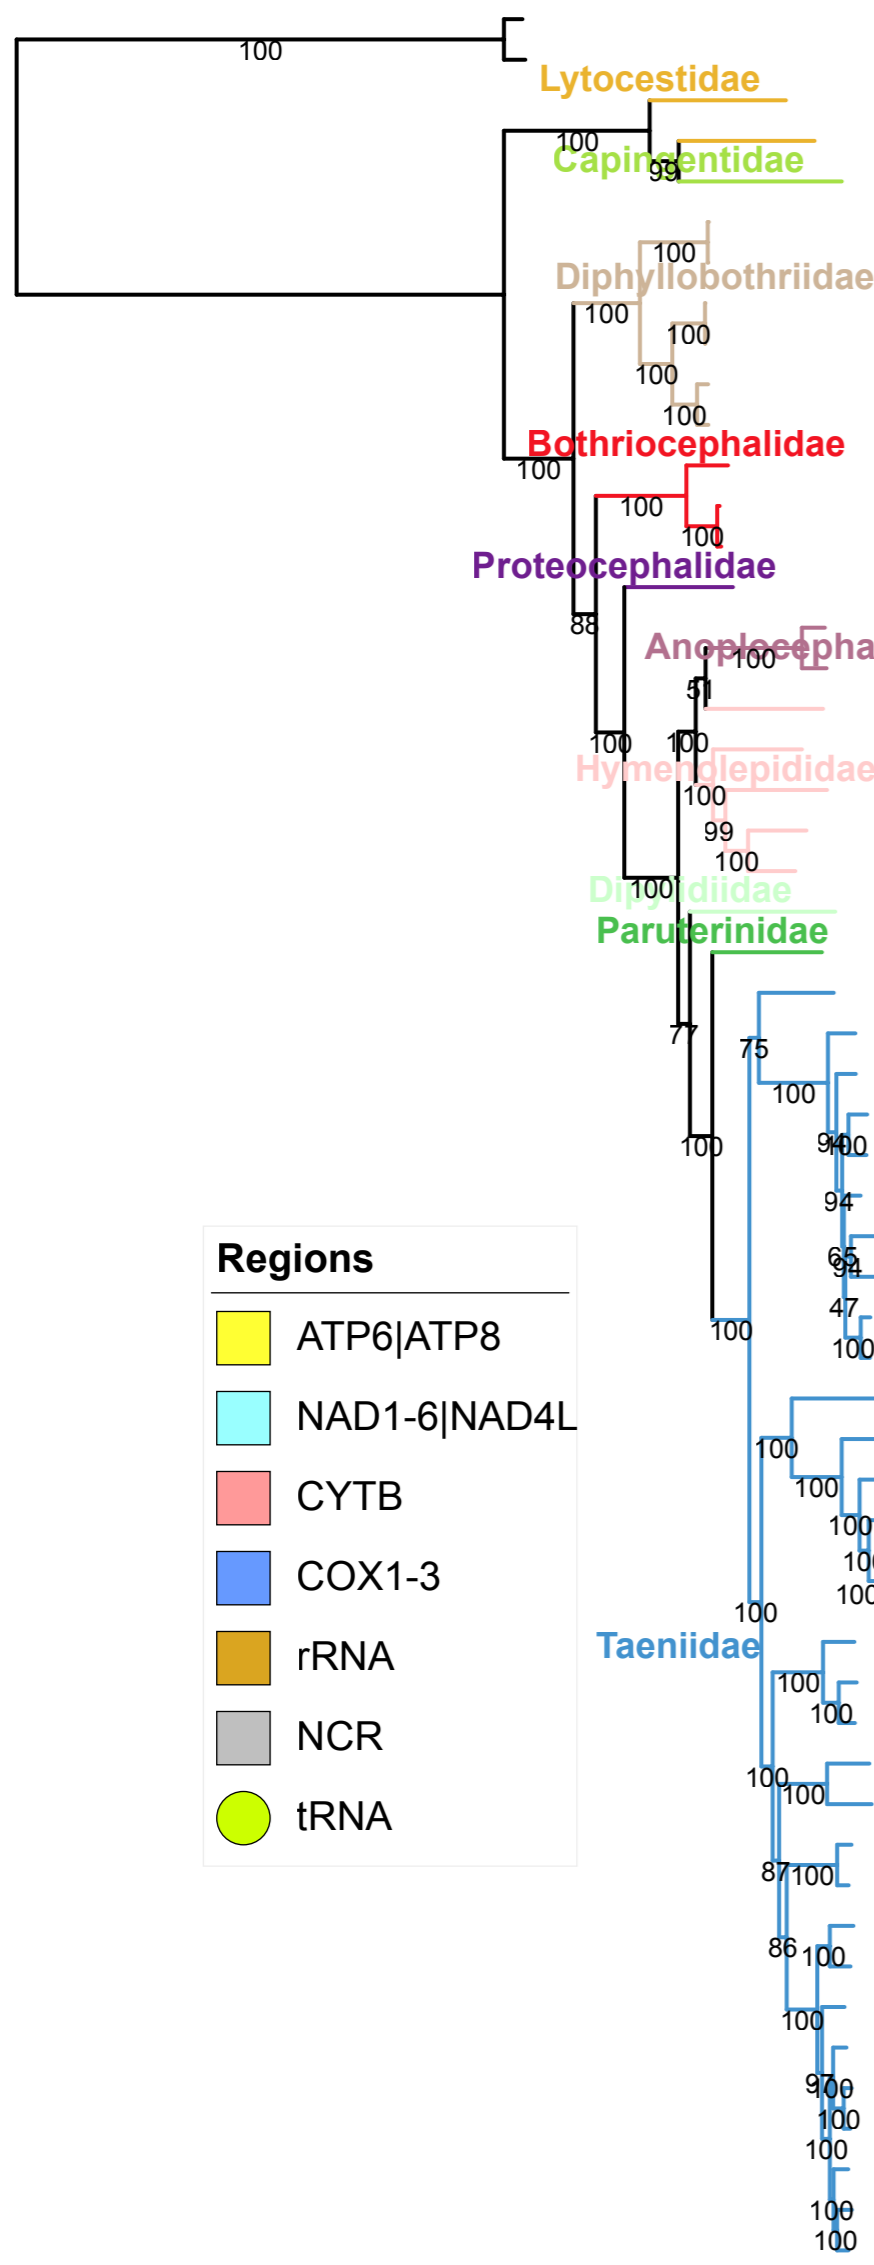

| Species                                 | COX1 | T | 16S  | C   | 12S | L1-S2-L2 | NCR1 | COX2 | E          | NAD6       | Y-R        | NAD5 | G       | NCR2 | COX3 | H    | CYTB | NAD4L | NAD4  | Q-F-M | ATP6  | NAD2  | V-A-D | NAD1  | N-P-I-K | NAD3    | S1-W    |      |      |
|-----------------------------------------|------|---|------|-----|-----|----------|------|------|------------|------------|------------|------|---------|------|------|------|------|-------|-------|-------|-------|-------|-------|-------|---------|---------|---------|------|------|
| <i>Dicrocoelium dendriticum</i>         |      |   |      |     |     |          |      |      |            |            |            |      |         |      |      |      |      |       |       |       |       |       |       |       |         |         |         |      |      |
| <i>Dicrocoelium chinensis</i>           |      |   |      |     |     |          |      |      |            |            |            |      |         |      |      |      |      |       |       |       |       |       |       |       |         |         |         |      |      |
| <i>Khawia sinensis</i>                  | COX1 | T | 16S  | C   | 12S | L1-S2-L2 | NCR1 | COX2 | E          | NAD6       | Y-R        | NAD5 | G       | NCR2 | COX3 | H    | CYTB | NAD4L | NAD4  | Q-F-M | ATP6  | NAD2  | V-A-D | NAD1  | N-P-I-K | NAD3    | S1-W    |      |      |
| <i>Atractolytocestus huronensis</i>     | COX1 | T | 16S  | C   | 12S | L1-S2-L2 | NCR1 | COX2 | E          | NAD6       | Y-R        | NAD5 | G       | NCR2 | COX3 | H    | CYTB | NAD4L | NAD4  | Q-F-M | ATP6  | NAD2  | V-A-D | NAD1  | N-P-I-K | NAD3    | S1-W    |      |      |
| <i>Breviscolex orientalis</i>           | COX1 | T | 16S  | C   | 12S | L1-S2-L2 | NCR1 | COX2 | E          | NAD6       | Y-R        | NAD5 | G       | NCR2 | COX3 | H    | CYTB | NAD4L | NAD4  | Q-F-M | ATP6  | NAD2  | V-A-D | NAD1  | N-P-I-K | NAD3    | S1-W    |      |      |
| <i>Spirometra decipiens</i>             | COX1 | T | 16S  | C   | 12S | COX2     | E    | NAD6 | Y          | NCR1       | L1-S2-L2-R | NAD5 | G       | NCR2 | COX3 | H    | CYTB | NAD4L | NAD4  | Q-F-M | ATP6  | NAD2  | V-A-D | NAD1  | N-P-I-K | NAD3    | S1-W    |      |      |
| <i>Spirometra erinacei</i>              | COX1 | T | 16S  | C   | 12S | COX2     | E    | NAD6 | Y          | NCR1       | L1-S2-L2-R | NAD5 | G       | NCR2 | COX3 | H    | CYTB | NAD4L | NAD4  | Q-F-M | ATP6  | NAD2  | V-A-D | NAD1  | N-P-I-K | NAD3    | S1-W    |      |      |
| <i>Diplogonoporus balaenopterae</i>     | COX1 | T | 16S  | C   | 12S | COX2     | E    | NAD6 | Y          | NCR1       | L1-S2-L2-R | NAD5 | G       | NCR2 | COX3 | H    | CYTB | NAD4L | NAD4  | Q-F-M | ATP6  | NAD2  | V-A-D | NAD1  | N-P-I-K | NAD3    | S1-W    |      |      |
| <i>Diplogonoporus grandis</i>           | COX1 | T | 16S  | C   | 12S | COX2     | E    | NAD6 | Y          | NCR1       | L1-S2-L2-R | NAD5 | G       | NCR2 | COX3 | H    | CYTB | NAD4L | NAD4  | Q-F-M | ATP6  | NAD2  | V-A-D | NAD1  | N-P-I-K | NAD3    | S1-W    |      |      |
| <i>Diphyllobothrium nihonkaiense</i>    | COX1 | T | 16S  | C   | 12S | COX2     | E    | NAD6 | Y          | NCR1       | L1-S2-L2-R | NAD5 | G       | NCR2 | COX3 | H    | CYTB | NAD4L | NAD4  | Q-F-M | ATP6  | NAD2  | V-A-D | NAD1  | N-P-I-K | NAD3    | S1-W    |      |      |
| <i>Diphyllobothrium latum</i>           | COX1 | T | 16S  | C   | 12S | COX2     | E    | NAD6 | Y          | NCR1       | L1-S2-L2-R | NAD5 | G       | NCR2 | COX3 | H    | CYTB | NAD4L | NAD4  | Q-F-M | ATP6  | NAD2  | V-A-D | NAD1  | N-P-I-K | NAD3    | S1-W    |      |      |
| <i>Schyzocotyle nayarensis</i>          | COX1 | T | 16S  | C   | 12S | COX2     | E    | NAD6 | L1-L2-Y-S2 | NCR1       | R          | NAD5 | G       | NCR2 | COX3 | H    | CYTB | NAD4L | NAD4  | Q-F-M | ATP6  | NAD2  | V-A-D | NAD1  | N-P-I-K | NAD3    | S1-W    |      |      |
| <i>Schyzocotyle acheilognathi (USA)</i> | COX1 | T | 16S  | C   | 12S | COX2     | E    | NAD6 | L1-L2-Y-S2 | NCR1       | R          | NAD5 | G       | NCR2 | COX3 | H    | CYTB | NAD4L | NAD4  | Q-F-M | ATP6  | NAD2  | V-A-D | NAD1  | N-P-I-K | NAD3    | S1-W    |      |      |
| <i>Schyzocotyle acheilognathi (CN)</i>  | COX1 | T | NCR1 | 16S | C   | 12S      | COX2 | E    | NAD6       | L1-L2-Y-S2 | NCR2       | R    | NAD5    | G    | NCR3 | COX3 | H    | CYTB  | NAD4L | NAD4  | Q-F-M | ATP6  | NAD2  | V-A-D | NAD1    | N-P-I-K | NAD3    | S1-W |      |
| <i>Testudotaenia sp. WL-2016</i>        | COX1 | T | 16S  | C   | 12S | COX2     | E    | NAD6 | Y          | NCR1       | S2-L1-L2-R | NAD5 | G       | NCR2 | COX3 | H    | CYTB | NAD4L | NAD4  | Q-F-M | ATP6  | NAD2  | V-A-D | NAD1  | N-P-I-K | NAD3    | S1-W    |      |      |
| <i>Anoplocephala magna</i>              | COX1 | T | 16S  | C   | 12S | COX2     | E    | NAD6 | Y          | NCR1       | S2-L1-L2-R | NAD5 | G       | NCR2 | COX3 | H    | CYTB | NAD4L | NAD4  | Q-F-M | ATP6  | NAD2  | V-A-D | NAD1  | N-P-I-K | NAD3    | S1-W    |      |      |
| <i>Anoplocephala perfoliata</i>         | COX1 | T | 16S  | C   | 12S | COX2     | E    | NAD6 | Y          | NCR1       | S2-L1-L2-R | NAD5 | G       | NCR2 | COX3 | H    | CYTB | NAD4L | NAD4  | Q-F-M | ATP6  | NAD2  | V-A-D | NAD1  | N-P-I-K | NAD3    | S1-W    |      |      |
| <i>Cloacotaenia megalops</i>            | COX1 | T | 16S  | C   | 12S | COX2     | E    | NAD6 | Y          | NCR1       | S2-L1-L2-R | NAD5 | G       | NCR2 | COX3 | H    | CYTB | NAD4L | NAD4  | Q-F-M | ATP6  | NAD2  | V-A-D | NAD1  | N-P-I-K | NAD3    | S1-W    |      |      |
| <i>Drepanidotaenia lanceolata</i>       | COX1 | T | 16S  | C   | 12S | COX2     | E    | NAD6 | Y          | NCR1       | S2-L1-L2-R | NAD5 | G       | NCR2 | COX3 | H    | CYTB | NAD4L | NAD4  | Q-F-M | ATP6  | NAD2  | V-A-D | NAD1  | N-P-I-K | NAD3    | S1-W    |      |      |
| <i>Hymenolepis nana</i>                 | COX1 | T | 16S  | C   | 12S | COX2     | E    | NAD6 | Y          | NCR1       | S2-L1-L2-R | NAD5 | G       | NCR2 | COX3 | H    | CYTB | NAD4L | NAD4  | Q-F-M | ATP6  | NAD2  | V-A-D | NAD1  | N-P-I-K | NAD3    | S1-W    |      |      |
| <i>Pseudanoplocephala crawfordi</i>     | COX1 | T | 16S  | C   | 12S | COX2     | E    | NAD6 | Y          | NCR1       | S2-L1-L2-R | NAD5 | G       | NCR3 | COX3 | H    | CYTB | NAD4L | NAD4  | Q-F-M | ATP6  | NAD2  | V-A-D | NAD1  | N-P-I-K | NAD3    | S1-W    |      |      |
| <i>Hymenolepis diminuta</i>             | COX1 | T | 16S  | C   | 12S | COX2     | E    | NAD6 | Y          | NCR1       | S2-L1-L2-R | NAD5 | G       | NCR2 | COX3 | H    | CYTB | NAD4L | NAD4  | Q-F-M | ATP6  | NAD2  | V-A-D | NAD1  | N-P-I-K | NAD3    | S1-W    |      |      |
| <i>Dipylidium caninum</i>               | COX1 | T | 16S  | C   | 12S | COX2     | E    | NAD6 | Y-S2       | NCR1       | L1-L2-R    | NAD5 | G       | NCR2 | COX3 | H    | CYTB | NAD4L | NAD4  | Q-F-M | ATP6  | NAD2  | V-A-D | NAD1  | N-P-I-K | NAD3    | S1-W    |      |      |
| <i>Cladotaenia vulturi</i>              | COX1 | T | 16S  | C   | 12S | COX2     | E    | NAD6 | Y          | NCR1       | S2-L1-L2-R | NAD5 | G       | NCR2 | COX3 | H    | CYTB | NAD4L | NAD4  | Q-F-M | ATP6  | NAD2  | V-A-D | NAD1  | N-P-I-K | NAD3    | S1-W    |      |      |
| <i>Versteria mustelae</i>               | COX1 | T | 16S  | C   | 12S | COX2     | E    | NAD6 | Y          | NCR1       | L1-S2-L2-R | NAD5 | G       | NCR2 | COX3 | H    | CYTB | NAD4L | NAD4  | Q-F-M | ATP6  | NAD2  | V-A-D | NAD1  | N-P-I-K | NAD3    | S1-W    |      |      |
| <i>Echinococcus oligarthrus</i>         | COX1 | T | 16S  | C   | 12S | COX2     | E    | NAD6 | Y          | NCR1       | L1-S2-L2-R | NAD5 | G       | NCR2 | COX3 | H    | CYTB | NAD4L | NAD4  | Q-F-M | ATP6  | NAD2  | V-A-D | NAD1  | N-P-I-K | NAD3    | S1-W    |      |      |
| <i>Echinococcus vogeli</i>              | COX1 | T | 16S  | C   | 12S | COX2     | E    | NAD6 | Y          | NCR1       | L1-S2-L2-R | NAD5 | G       | NCR2 | COX3 | H    | CYTB | NAD4L | NAD4  | Q-F-M | ATP6  | NAD2  | V-A-D | NAD1  | N-P-I-K | NAD3    | S1-W    |      |      |
| <i>Echinococcus granulosus</i>          | COX1 | T | 16S  | C   | 12S | COX2     | E    | NAD6 | Y          | NCR1       | L1-S2-L2-R | NAD5 | G       | NCR2 | COX3 | H    | CYTB | NAD4L | NAD4  | Q-F-M | ATP6  | NAD2  | V-A-D | NAD1  | N-P-I-K | NAD3    | S1-W    |      |      |
| <i>Echinococcus felidis</i>             | COX1 | T | 16S  | C   | 12S | COX2     | E    | NAD6 | Y          | NCR1       | L1-S2-L2-R | NAD5 | G       | NCR2 | COX3 | H    | CYTB | NAD4L | NAD4  | Q-F-M | ATP6  | NAD2  | V-A-D | NAD1  | N-P-I-K | NAD3    | S1-W    |      |      |
| <i>Echinococcus equinus</i>             | COX1 | T | 16S  | C   | 12S | COX2     | E    | NAD6 | Y          | NCR1       | L1-S2-L2-R | NAD5 | G       | NCR2 | COX3 | H    | CYTB | NAD4L | NAD4  | Q-F-M | ATP6  | NAD2  | V-A-D | NAD1  | N-P-I-K | NAD3    | S1-W    |      |      |
| <i>Echinococcus multilocularis</i>      | COX1 | T | 16S  | C   | 12S | COX2     | E    | NAD6 | Y          | NCR1       | L1-S2-L2-R | NAD5 | G       | NCR2 | COX3 | H    | CYTB | NAD4L | NAD4  | Q-F-M | ATP6  | NAD2  | V-A-D | NAD1  | N-P-I-K | NAD3    | S1-W    |      |      |
| <i>Echinococcus shiquicus</i>           | COX1 | T | 16S  | C   | 12S | COX2     | E    | NAD6 | Y          | NCR1       | L1-S2-L2-R | NAD5 | G       | NCR2 | COX3 | H    | CYTB | NAD4L | NAD4  | Q-F-M | ATP6  | NAD2  | V-A-D | NAD1  | N-P-I-K | NAD3    | S1-W    |      |      |
| <i>Echinococcus canadensis</i>          | COX1 | T | 16S  | C   | 12S | COX2     | E    | NAD6 | Y          | NCR1       | L1-S2-L2-R | NAD5 | G       | NCR2 | COX3 | H    | CYTB | NAD4L | NAD4  | Q-F-M | ATP6  | NAD2  | V-A-D | NAD1  | N-P-I-K | NAD3    | S1-W    |      |      |
| <i>Echinococcus orteppi</i>             | COX1 | T | 16S  | C   | 12S | COX2     | E    | NAD6 | Y          | NCR1       | L1-S2-L2-R | NAD5 | G       | NCR2 | COX3 | H    | CYTB | NAD4L | NAD4  | Q-F-M | ATP6  | NAD2  | V-A-D | NAD1  | N-P-I-K | NAD3    | S1-W    |      |      |
| <i>Hydatigera parva</i>                 | COX1 | T | 16S  | C   | 12S | COX2     | E    | NAD6 | Y          | NCR1       | L1-S2-L2-R | NAD5 | G       | NCR2 | COX3 | H    | CYTB | NAD4L | NAD4  | Q-F-M | ATP6  | NAD2  | V-A-D | NAD1  | N-P-I-K | NAD3    | S1-W    |      |      |
| <i>Hydatigera krepkogorski</i>          | COX1 | T | 16S  | C   | 12S | COX2     | E    | NAD6 | Y-L1       | NCR1       | S2-L2-R    | NAD5 | G       | NCR2 | COX3 | H    | CYTB | NAD4L | NAD4  | Q-F-M | ATP6  | NAD2  | V-A-D | NAD1  | N-P-I-K | NAD3    | S1-W    |      |      |
| <i>Hydatigera taeniaeformis (CN)</i>    | COX1 | T | 16S  | C   | 12S | COX2     | E    | NAD6 | Y-L1       | NCR1       | S2-L2-R    | NAD5 | G       | NCR3 | COX3 | H    | CYTB | NAD4L | NAD4  | Q-F-M | ATP6  | NAD2  | V-A-D | NAD1  | N-P-I-K | NAD3    | S1-W    |      |      |
| <i>Hydatigera sp. HCFr</i>              | COX1 | T | 16S  | C   | 12S | COX2     | E    | NAD6 | Y-L1       | NCR1       | S2-L2-R    | NAD5 | G       | NCR2 | COX3 | H    | CYTB | NAD4L | NAD4  | Q-F-M | ATP6  | NAD2  | V-A-D | NAD1  | N-P-I-K | NAD3    | S1-W    |      |      |
| <i>Hydatigera kamiyai</i>               | COX1 | T | 16S  | C   | 12S | COX2     | E    | NAD6 | Y-L1       | NCR1       | S2-L2-R    | NAD5 | G       | NCR2 | COX3 | H    | CYTB | NAD4L | NAD4  | Q-F-M | ATP6  | NAD2  | V-A-D | NAD1  | N-P-I-K | NAD3    | S1-W    |      |      |
| <i>Hydatigera taeniaeformis (GER)</i>   | COX1 | T | 16S  | C   | 12S | COX2     | E    | NAD6 | Y-L1       | NCR1       | S2-L2-R    | NAD5 | G       | NCR2 | COX3 | H    | CYTB | NAD4L | NAD4  | Q-F-M | ATP6  | NAD2  | V-A-D | NAD1  | N-P-I-K | NAD3    | S1-W    |      |      |
| <i>Taenia crassiceps</i>                | COX1 | T | 16S  | C   | 12S | COX2     | E    | NAD6 | Y          | NCR1       | L1-S2-L2-R | NAD5 | G       | NCR2 | COX3 | H    | CYTB | NAD4L | NAD4  | Q-F-M | ATP6  | NAD2  | V-A-D | NAD1  | N-P-I-K | NAD3    | S1-W    |      |      |
| <i>Taenia martis</i>                    | COX1 | T | 16S  | C   | 12S | COX2     | E    | NAD6 | Y          | NCR1       | L1-S2-L2-R | NAD5 | G       | NCR2 | COX3 | H    | CYTB | NAD4L | NAD4  | Q-F-M | ATP6  | NAD2  | V-A-D | NAD1  | N-P-I-K | NAD3    | S1-W    |      |      |
| <i>Taenia twitchelli</i>                | COX1 | T | 16S  | C   | 12S | COX2     | E    | NAD6 | Y          | NCR1       | L1-S2-L2-R | NAD5 | G       | NCR2 | COX3 | H    | CYTB | NAD4L | NAD4  | Q-F-M | ATP6  | NAD2  | V-A-D | NAD1  | N-P-I-K | NAD3    | S1-W    |      |      |
| <i>Taenia pisiformis</i>                | COX1 | T | 16S  | C   | 12S | COX2     | E    | NAD6 | Y          | NCR1       | L1-S2-L2-R | NAD5 | G       | NCR2 | COX3 | H    | CYTB | NAD4L | NAD4  | Q-F-M | ATP6  | NAD2  | V-A-D | NAD1  | N-P-I-K | NAD3    | S1-W    |      |      |
| <i>Taenia laticollis</i>                | COX1 | T | 16S  | C   | 12S | COX2     | E    | NAD6 | Y          | NCR1       | L1-S2-L2-R | NAD5 | G       | NCR2 | COX3 | H    | CYTB | NAD4L | NAD4  | Q-F-M | ATP6  | NAD2  | V-A-D | NAD1  | N-P-I-K | NAD3    | S1-W    |      |      |
| <i>Taenia hydatigena</i>                | COX1 | T | 16S  | C   | 12S | COX2     | E    | NAD6 | Y          | NCR1       | L1-S2-L2-R | NAD5 | G       | NCR2 | COX3 | H    | CYTB | NAD4L | NAD4  | Q-F-M | ATP6  | NAD2  | V-A-D | NAD1  | N-P-I-K | NAD3    | S1-W    |      |      |
| <i>Taenia regis</i>                     | COX1 | T | 16S  | C   | 12S | COX2     | E    | NAD6 | Y          | NCR1       | L1-S2-L2-R | NAD5 | G       | NCR2 | COX3 | H    | CYTB | NAD4L | NAD4  | Q-F-M | ATP6  | NAD2  | V-A-D | NAD1  | N-P-I-K | NAD3    | S1-W    |      |      |
| <i>Taenia arctos</i>                    | COX1 | T | 16S  | C   | 12S | COX2     | E    | NAD6 | Y          | NCR1       | L1-S2-L2-R | NAD5 | G       | NCR2 | COX3 | H    | CYTB | NAD4L | NAD4  | Q-F-M | ATP6  | NAD2  | V-A-D | NAD1  | N-P-I-K | NAD3    | S1-W    |      |      |
| <i>Taenia solium</i>                    | COX1 | T | 16S  | C   | 12S | COX2     | E    | NAD6 | Y          | NCR1       | L1         | NCR2 | S2-L2-R | NAD5 | G    | NCR3 | COX3 | H     | CYTB  | NAD4L | NAD4  | Q-F-M | ATP6  | NAD2  | V-A-D   | NAD1    | N-P-I-K | NAD3 | S1-W |
| <i>Taenia ovis</i>                      | COX1 | T | 16S  | C   | 12S | COX2     | E    | NAD6 | Y          | NCR1       | L1-S2-L2-R | NAD5 | G       | NCR2 | COX3 | H    | CYTB | NAD4L | NAD4  | Q-F-M | ATP6  | NAD2  | V-A-D | NAD1  | N-P-I-K | NAD3    | S1-W    |      |      |
| <i>Taenia crocutae</i>                  | COX1 | T | 16S  | C   | 12S | COX2     | E    | NAD6 | Y          | NCR1       | L1         | NCR2 | S2-L2-R | NAD5 | G    | NCR3 | COX3 | H     | CYTB  | NAD4L | NAD4  | Q-F-M | ATP6  | NAD2  | V-A-D   | NAD1    | N-P-I-K | NAD3 | S1-W |
| <i>Taenia asiatica</i>                  | COX1 | T | 16S  | C   | 12S | COX2     | E    | NAD6 | Y          | NCR1       | L1-S2-L2-R | NAD5 | G       | NCR2 | COX3 | H    | CYTB | NAD4L | NAD4  | Q-F-M | ATP6  | NAD2  | V-A-D | NAD1  | N-P-I-K | NAD3    | S1-W    |      |      |
| <i>Taenia saginata</i>                  | COX1 | T | 16S  | C   | 12S | COX2     | E    | NAD6 | Y          | NCR1       | L1-S2-L2-R | NAD5 | G       | NCR2 | COX3 | H    | CYTB | NAD4L | NAD4  | Q-F-M | ATP6  | NAD2  | V-A-D | NAD1  | N-P-I-K | NAD3    | S1-W    |      |      |
| <i>Taenia multiceps</i>                 | COX1 | T | 16S  | C   | 12S | COX2     | E    | NAD6 | Y          | NCR1       | L1-S2-L2-R | NAD5 | G       | NCR2 | COX3 | H    | CYTB | NAD4L | NAD4  | Q-F-M | ATP6  | NAD2  | V-A-D | NAD1  | N-P-I-K | NAD3    | S1-W    |      |      |
| <i>Taenia serialis</i>                  | COX1 | T | 16S  | C   | 12S | COX2     | E    | NAD6 | Y          | NCR1       | L1-S2-L2-R | NAD5 | G       | NCR2 | COX3 | H    | CYTB | NAD4L | NAD4  | Q-F-M | ATP6  | NAD2  | V-A-D | NAD1  | N-P-I-K | NAD3    | S1-W    |      |      |
| <i>Taenia madoquae</i>                  | COX1 | T | 16S  | C   | 12S | COX2     | E    | NAD6 | Y          | NCR1       | L1-S2-L2-R | NAD5 | G       | NCR2 | COX3 | H    | CYTB | NAD4L | NAD4  | Q-F-M | ATP6  | NAD2  | V-A-D | NAD1  | N-P-I-K | NAD3    | S1-W    |      |      |

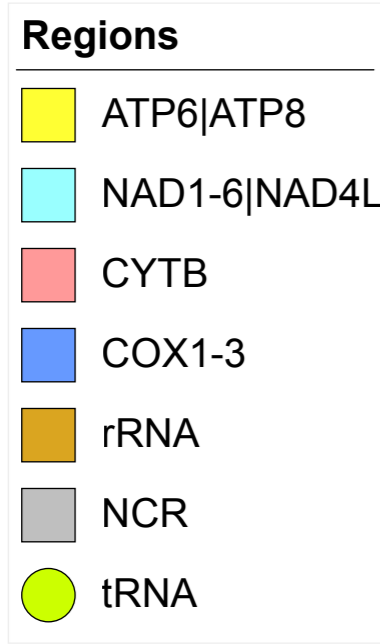

Supplement: 13071_2017_2245_MOESM6_ESM.pdf [file 13071_2017_2245_MOESM6_ESM.pdf]
