# Supplementary material for: The complete mitochondrial DNA of three monozoic tapeworms in the Caryophyllidea: a mitogenomic perspective on the phylogeny of eucestodes
Source: PubMed Central journal article supplement (PMC5488446; doi:10.1186/s13071-017-2245-y), 2017-06-27
Supplement: 13071_2017_2245_MOESM4_ESM.pdf [file 13071_2017_2245_MOESM4_ESM.pdf]

### *Atractolytocestus huronensis*

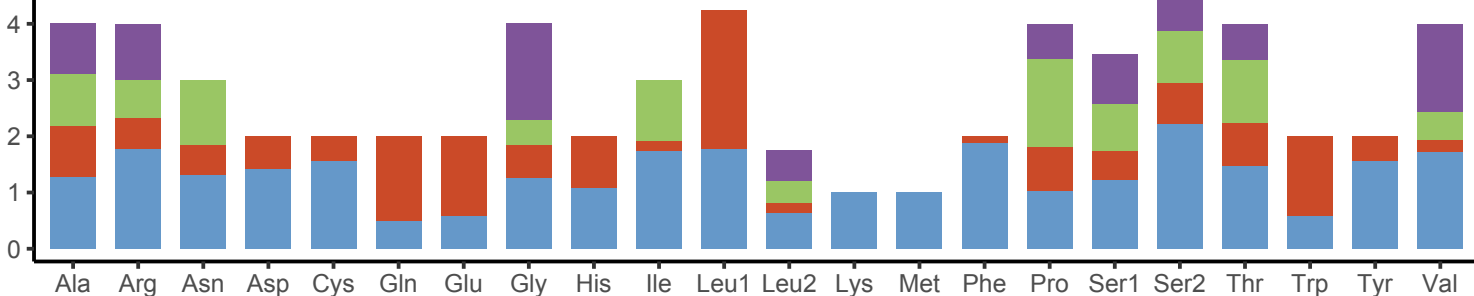

### *Breviscolex orientalis*

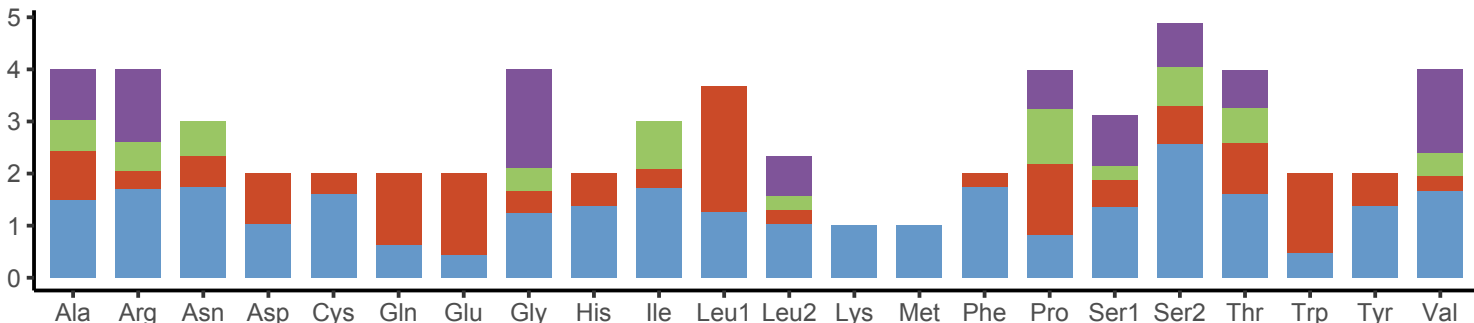

### *Khawia sinensis*

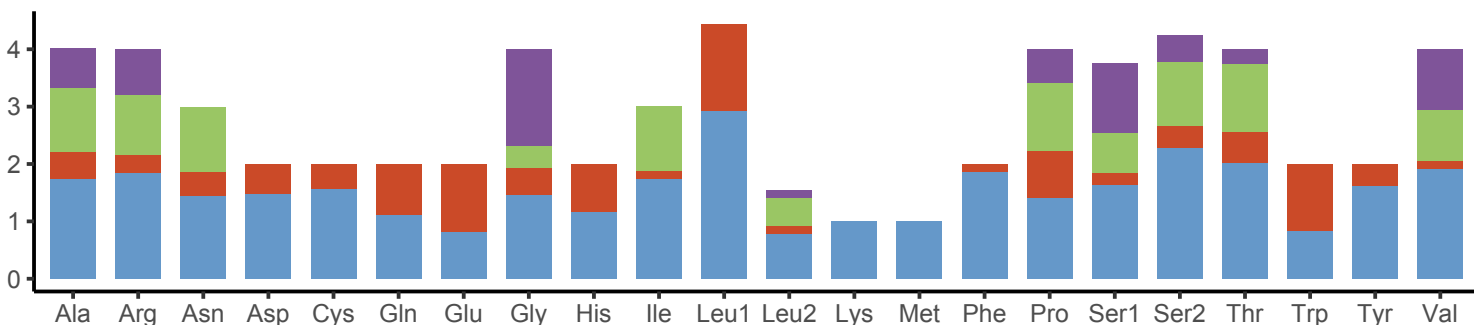

### *Schyzocotyle acheilognathi* (CN)

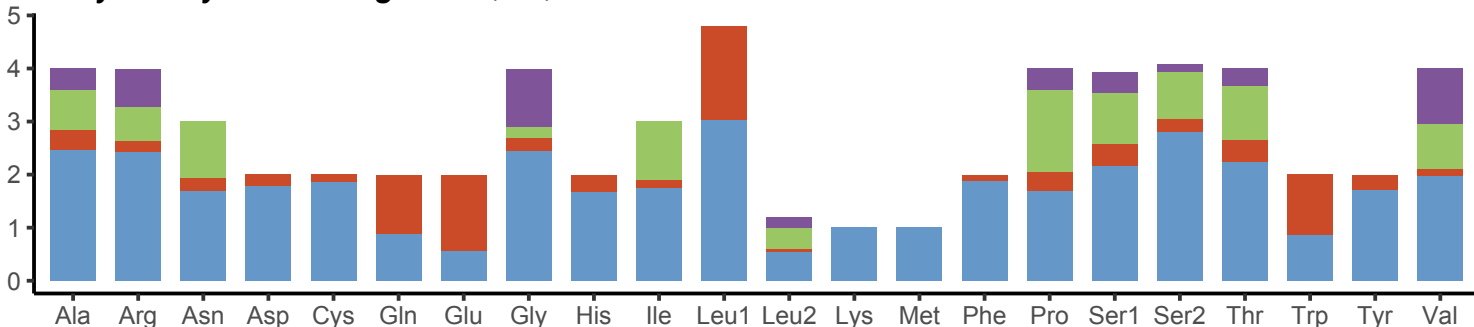

|     |     |     |     |     |     |     |     |     |     |     |     |     |     |     |     |     |     |     |     |     |     |
|-----|-----|-----|-----|-----|-----|-----|-----|-----|-----|-----|-----|-----|-----|-----|-----|-----|-----|-----|-----|-----|-----|
| GCU | CGU | AAU | GAU | UGU | CAA | GAA | GGU | CAU | AUU | UUA | CUU | AAG | AUG | UUU | CCU | AGU | UCU | ACU | UGA | UAU | GUU |
| GCC | CGC | AAC | GAC | UGC | CAG | GAG | GGC | CAC | AUC | UUG | CUC |     |     | UUC | CCC | AGC | UCC | ACC | UGG | UAC | GUC |
| GCA | CGA | AAA |     |     |     |     | GGA |     | AUA |     | CUA |     |     |     | CCA | AGA | UCA | ACA |     |     | GUA |
| GCG | CGG |     |     |     |     |     | GGG |     |     |     | CUG |     |     |     | CCG | AGG | UCG | ACG |     |     | GUG |
