# Supplementary material for: The complete mitochondrial DNA of three monozoic tapeworms in the Caryophyllidea: a mitogenomic perspective on the phylogeny of eucestodes
Source: PubMed Central journal article supplement (PMC5488446; doi:10.1186/s13071-017-2245-y), 2017-06-27

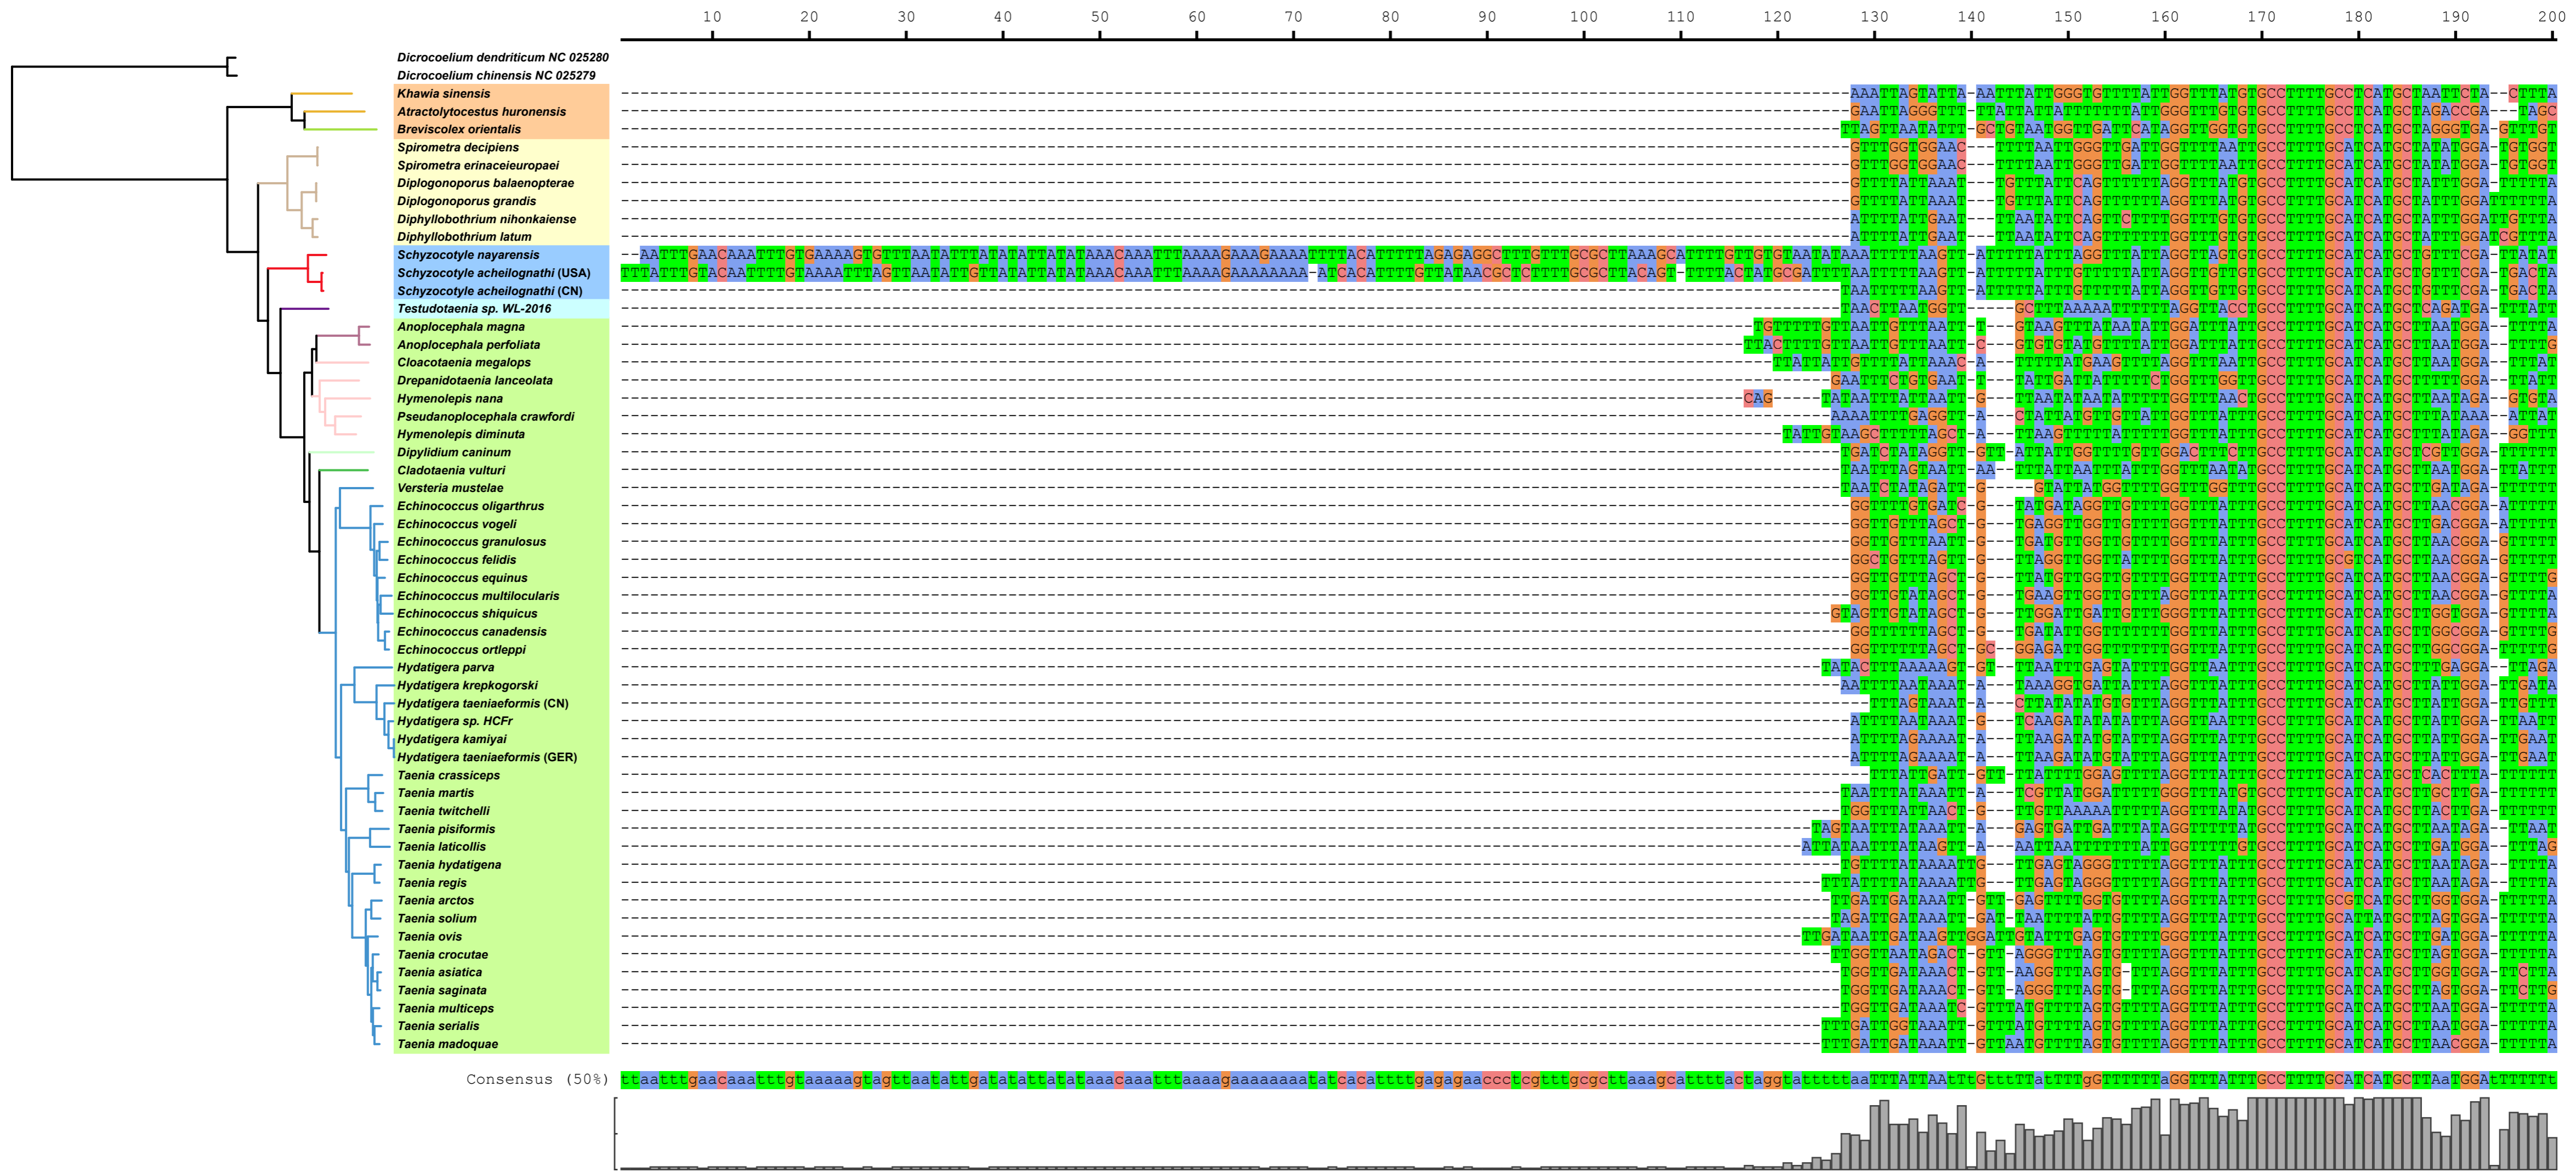

Supplement: 13071_2017_2245_MOESM7_ESM.pdf [file 13071_2017_2245_MOESM7_ESM.pdf]
