# Supplementary material for: The complete mitochondrial DNA of three monozoic tapeworms in the Caryophyllidea: a mitogenomic perspective on the phylogeny of eucestodes
Source: Parasit Vectors. 2017 Jun 27;10:314. doi: 10.1186/s13071-017-2245-y (PMC5488446; doi:10.1186/s13071-017-2245-y)

# *Breviscolex orientalis*

***Schyzocotyle acheilognathi* (CN)**

***trnS1***

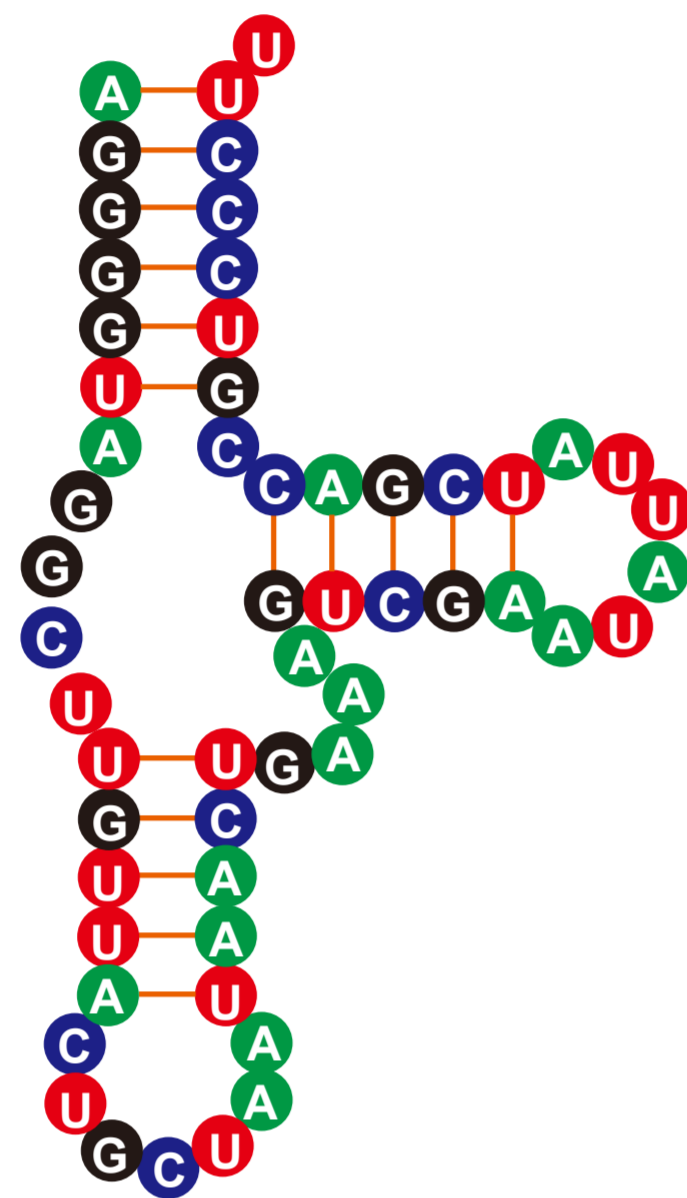

***trnR***

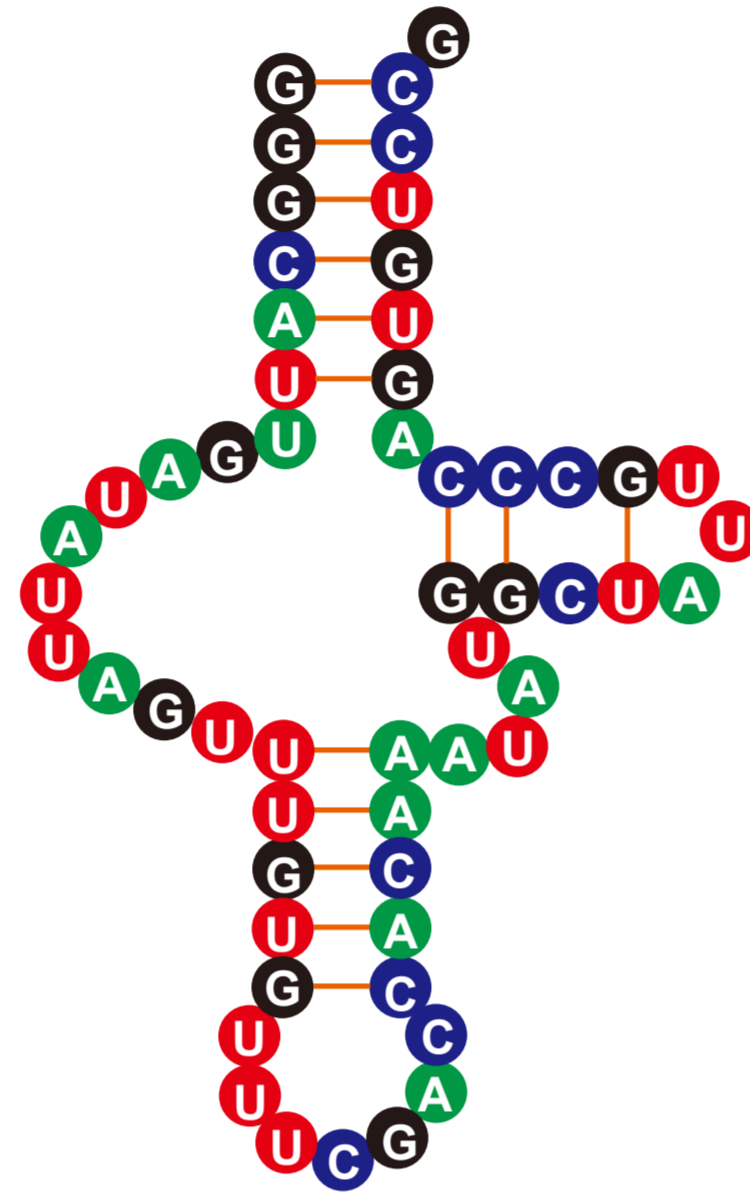

***trnS1***

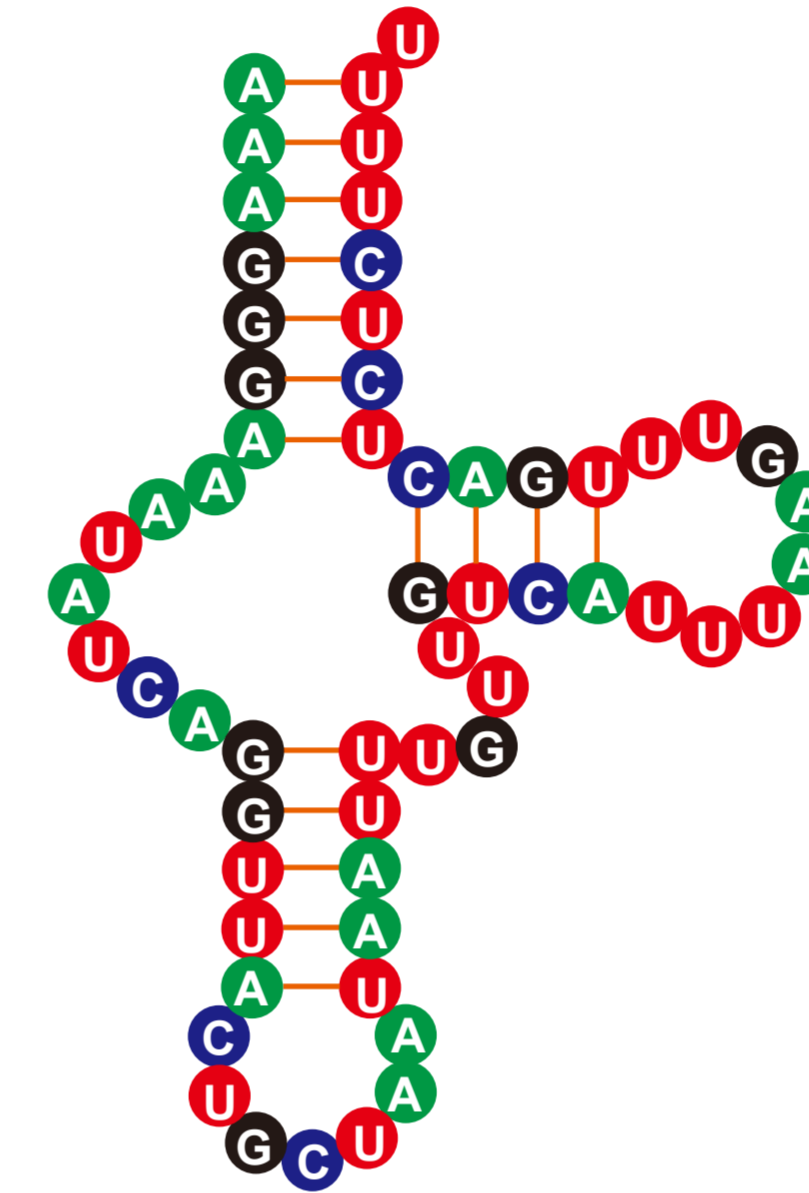

***trnR***

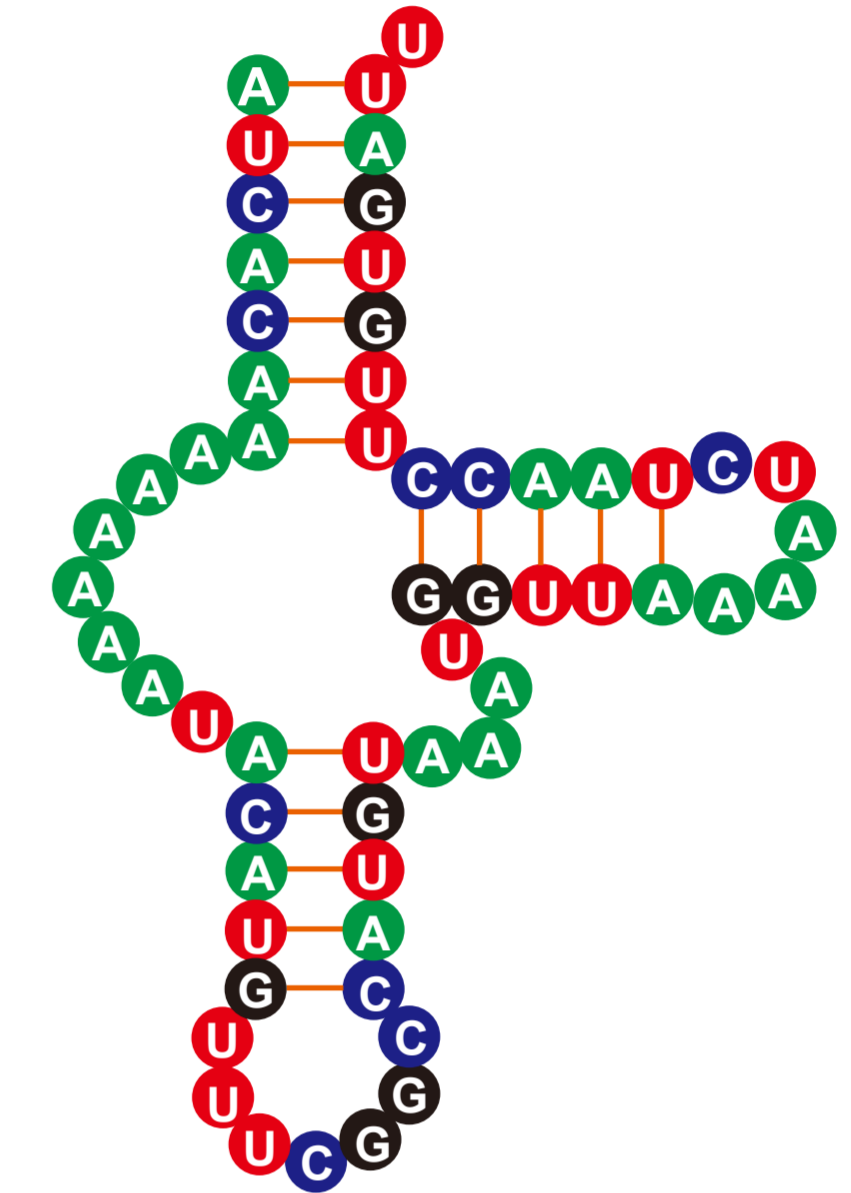

***Atractolytocestus huronensis***

## *Khawia sinensis*

***trnS1***

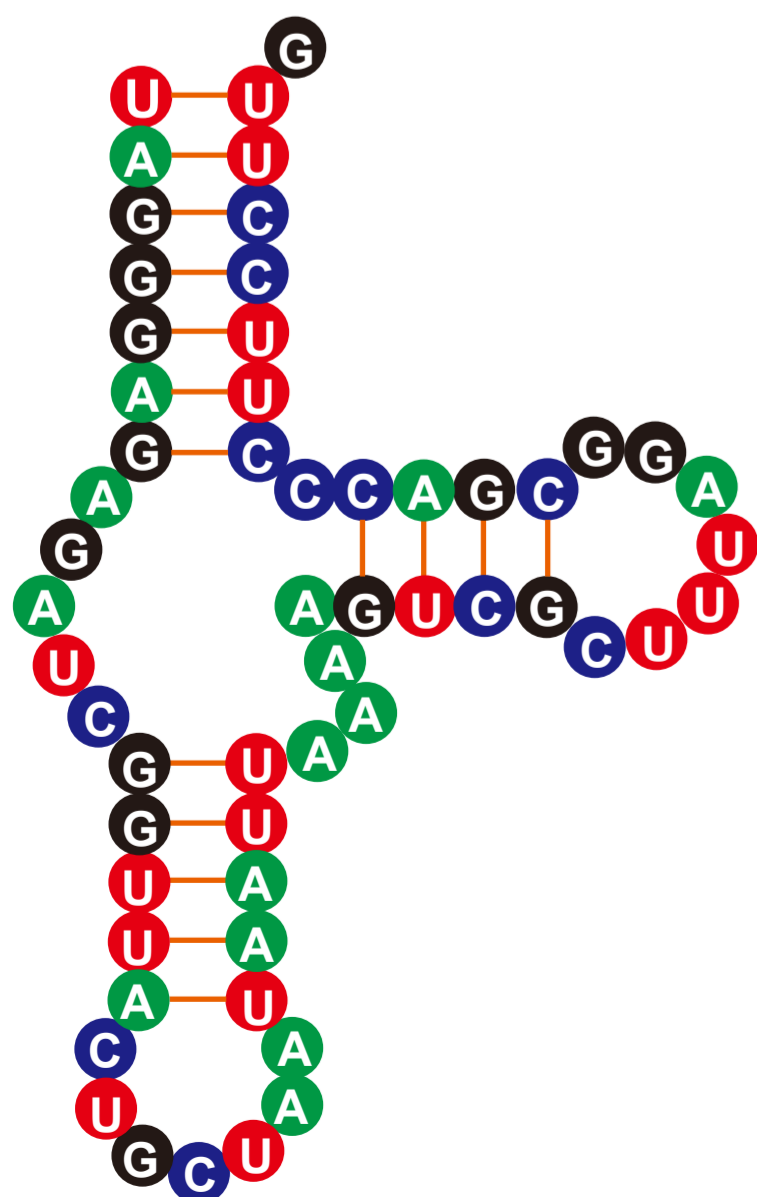

***trnR***

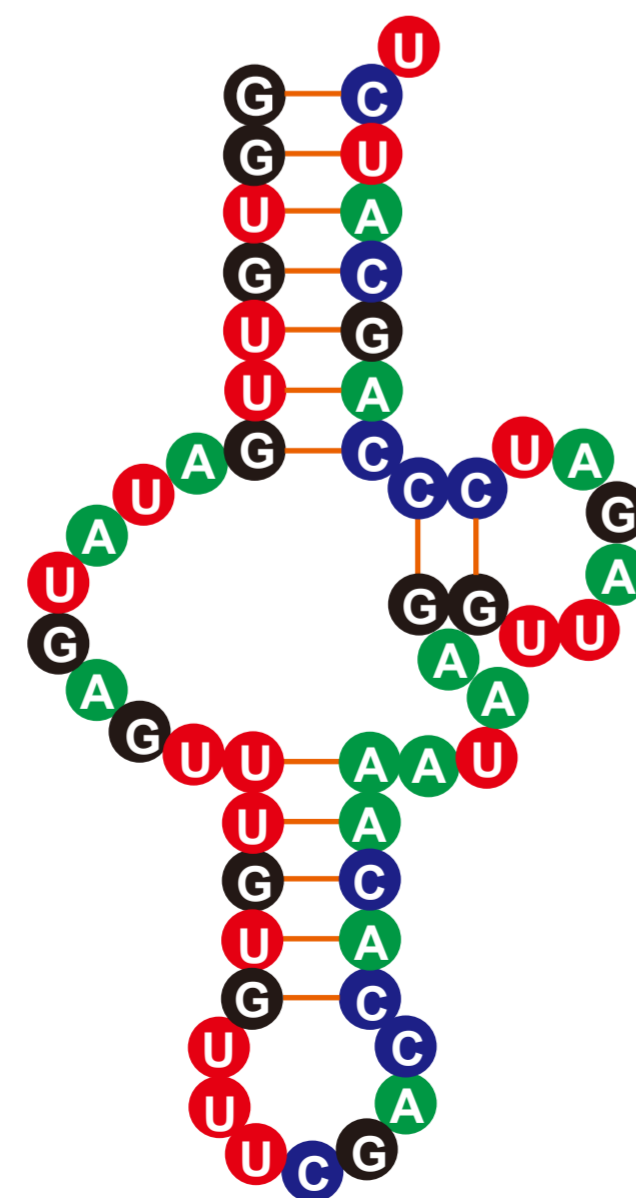

***trnC***

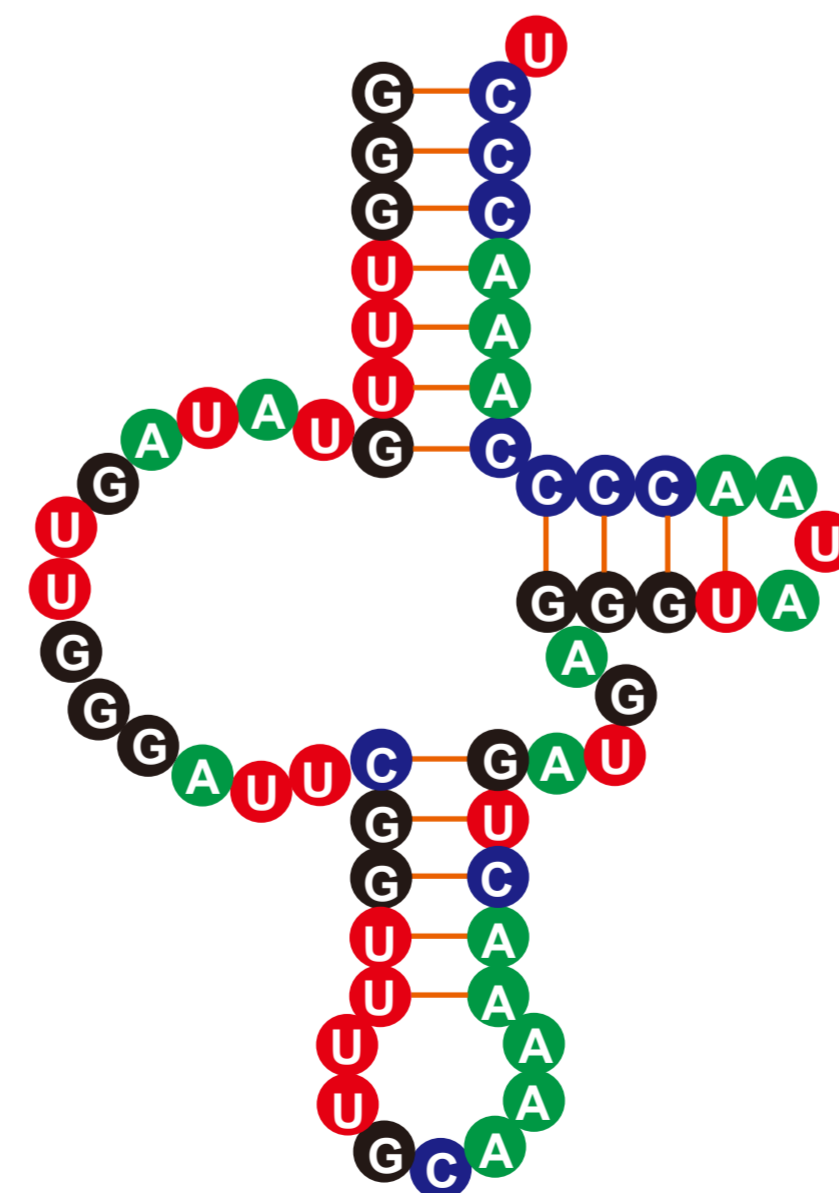

***trnS1***

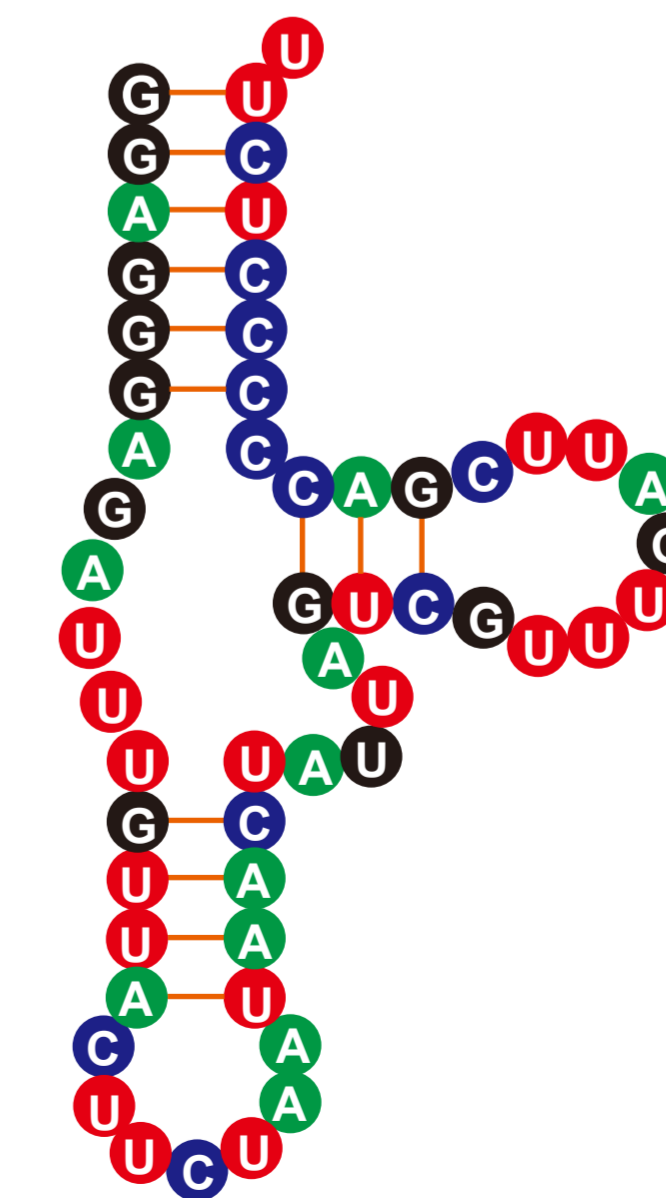

***trnR***

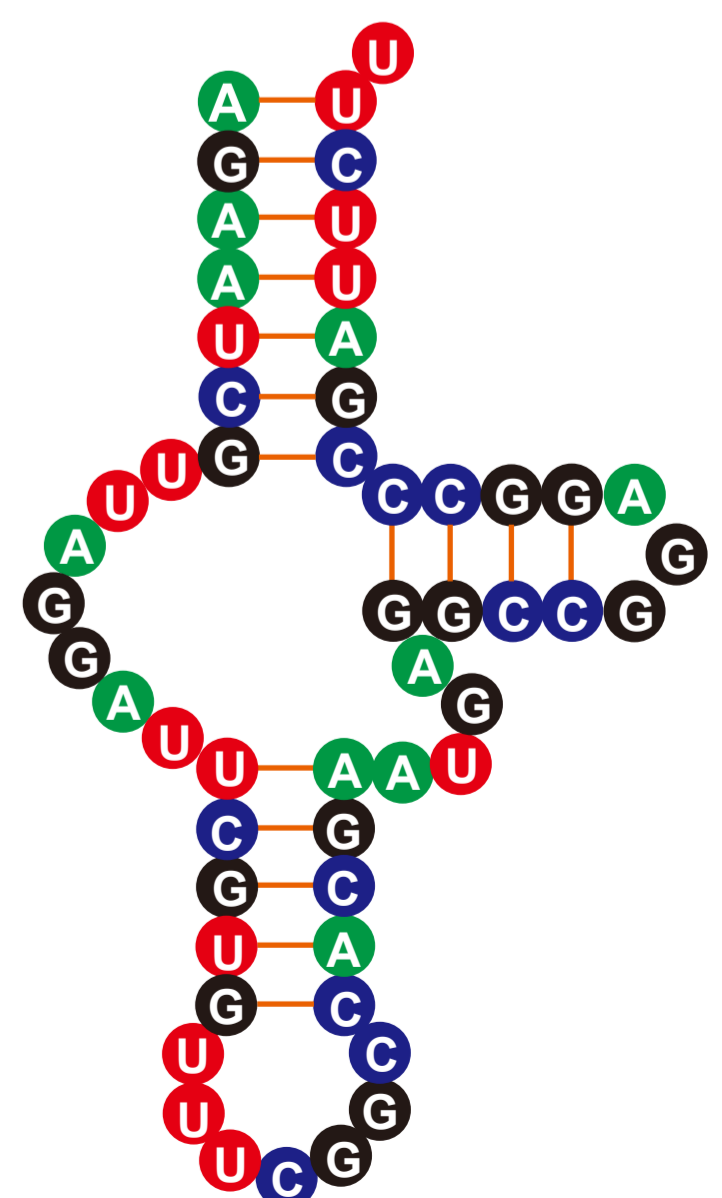

Supplement: Supplementary file 5 — Secondary structure (lacking DHU arms) of the tRNA genes of the cestodes Atractolytocestus huronensis, Khawia sinensis, Breviscolex orientalis and Schyzocotyle acheilognathi (CN). (PDF 472 kb) [file 13071_2017_2245_MOESM5_ESM.pdf]
